# Supplementary material for: Associations of Mortality with Long-Term Exposures to Fine and Ultrafine Particles, Species and Sources: Results from the California Teachers Study Cohort
Source: PubMed Central journal article supplement (PMC4455590; doi:10.1289/ehp.1408565), 2015-01-23
Supplement: ehp.1408565.s001.508.pdf [file ehp.1408565.s001.508.pdf]

**Supplemental Material**

**Associations of Mortality with Long-Term Exposures to Fine and  
Ultrafine Particles, Species and Sources: Results from the California  
Teachers Study Cohort**

Bart Ostro, Jianlin Hu, Debbie Goldberg, Peggy Reynolds, Andrew Hertz, Leslie Bernstein, and  
Michael J. Kleeman

**Table S1.** Correlations between PM<sub>2.5</sub> and various chemical species calculated from model predictions.

| <b>Exposure</b> | <b>Mass</b> | <b>Cu</b> | <b>EC</b> | <b>Fe</b> | <b>Mn</b> | <b>Oth Mtl</b> | <b>Nit</b> | <b>OC</b> | <b>Oth Spc</b> | <b>S_ant</b> | <b>S_bio</b> |
|-----------------|-------------|-----------|-----------|-----------|-----------|----------------|------------|-----------|----------------|--------------|--------------|
| Mass            | -           |           |           |           |           |                |            |           |                |              |              |
| Cu              | 0.64        | -         |           |           |           |                |            |           |                |              |              |
| EC              | 0.74        | 0.44      | -         |           |           |                |            |           |                |              |              |
| Fe              | 0.86        | 0.69      | 0.58      | -         |           |                |            |           |                |              |              |
| Mn              | 0.83        | 0.74      | 0.55      | 0.96      | -         |                |            |           |                |              |              |
| Oth Mtl         | 0.85        | 0.68      | 0.56      | 1.00      | 0.95      | -              |            |           |                |              |              |
| Nit             | 0.81        | 0.65      | 0.55      | 0.80      | 0.79      | 0.81           | -          |           |                |              |              |
| OC              | 0.73        | 0.38      | 0.90      | 0.52      | 0.49      | 0.49           | 0.43       | -         |                |              |              |
| Oth Spc         | 0.83        | 0.70      | 0.48      | 0.97      | 0.94      | 0.98           | 0.80       | 0.42      | -              |              |              |
| S_ant           | 0.76        | 0.51      | 0.54      | 0.62      | 0.61      | 0.61           | 0.84       | 0.42      | 0.59           | -            |              |
| S_bio           | 0.62        | 0.53      | 0.38      | 0.65      | 0.65      | 0.65           | 0.75       | 0.33      | 0.66           | 0.79         | -            |

Oth Mtl = Other metals; Oth Spc = Other species; Nit = Nitrate; S\_ant = anthropogenic; S\_bio = biogenic secondary organics.

**Table S2.** Correlations between UF and various chemical species calculated from model predictions.

| <b>Exposure</b> | <b>Mass</b> | <b>Cu</b> | <b>EC</b> | <b>Fe</b> | <b>Mn</b> | <b>Oth Mtl</b> | <b>Nit</b> | <b>OC</b> | <b>Oth Spc</b> | <b>S_ant</b> | <b>S_bio</b> |
|-----------------|-------------|-----------|-----------|-----------|-----------|----------------|------------|-----------|----------------|--------------|--------------|
| Mass            | -           |           |           |           |           |                |            |           |                |              |              |
| Cu              | 0.48        | -         |           |           |           |                |            |           |                |              |              |
| EC              | 0.74        | 0.19      | -         |           |           |                |            |           |                |              |              |
| Fe              | 0.77        | 0.64      | 0.69      | -         |           |                |            |           |                |              |              |
| Mn              | 0.27        | 0.50      | 0.19      | 0.63      | -         |                |            |           |                |              |              |
| Oth Mtl         | 0.94        | 0.71      | 0.70      | 0.86      | 0.34      | -              |            |           |                |              |              |
| Nit             | -           | -         | -         | -         | -         | -              | -          |           |                |              |              |
| OC              | 0.99        | 0.48      | 0.67      | 0.73      | 0.25      | 0.42           | -          | -         |                |              |              |
| Oth Spc         | 0.71        | 0.87      | 0.62      | 0.81      | 0.40      | 0.93           | -          | 0.68      | -              |              |              |
| S_ant           | 0.64        | 0.37      | 0.40      | 0.53      | 0.20      | 0.88           | -          | 0.62      | 0.41           | -            |              |
| S_bio           | 0.70        | 0.22      | 0.42      | 0.56      | 0.15      | 0.62           | -          | 0.69      | 0.34           | 0.75         | -            |

Oth Mtl = Other metals; Oth Spc = Other species; Nit = Nitrate; S\_ant = anthropogenic; S\_bio = biogenic secondary organics.

**Table S3.** Hazard ratios (HR) and 95% confidence interval (CI) for association of PM<sub>2.5</sub> and mortality outcomes.

| Exposure                            | IQR (µg/m <sup>3</sup> ) | All-cause mortality HR <sup>a</sup> (95% CI) | p-value | Cardiovascular mortality HR <sup>a</sup> (95% CI) | p-value | Pulmonary mortality HR <sup>a</sup> (95% CI) | p-value |
|-------------------------------------|--------------------------|----------------------------------------------|---------|---------------------------------------------------|---------|----------------------------------------------|---------|
| <b>Pollutant</b>                    |                          |                                              |         |                                                   |         |                                              |         |
| Mass                                | 9.6                      | 1.01 (0.98, 1.05)                            | 0.47    | 1.05 (0.99, 1.12)                                 | 0.10    | 0.99 (0.90, 1.09)                            | 0.87    |
| Cu                                  | 0.4 <sup>b</sup>         | 1.00 (0.98, 1.03)                            | 0.77    | 1.02 (0.98, 1.06)                                 | 0.32    | 1.00 (0.94, 1.08)                            | 0.92    |
| Fe                                  | 0.2                      | 1.00 (0.97, 1.04)                            | 0.83    | 1.00 (0.95, 1.06)                                 | 0.93    | 0.99 (0.90, 1.09)                            | 0.87    |
| Mn                                  | 4.0 <sup>b</sup>         | 1.00 (0.96, 1.03)                            | 0.80    | 1.00 (0.95, 1.06)                                 | 0.98    | 0.98 (0.90, 1.08)                            | 0.72    |
| Nitrate                             | 3.9                      | 1.03 (0.99, 1.08)                            | 0.13    | 1.10 (1.02, 1.18)                                 | <0.01   | 1.02 (0.90, 1.14)                            | 0.80    |
| EC                                  | 0.8                      | 1.00 (0.97, 1.04)                            | 0.95    | 1.04 (0.98, 1.09)                                 | 0.22    | 1.00 (0.91, 1.09)                            | 0.96    |
| OC                                  | 2.8                      | 1.00 (0.97, 1.04)                            | 0.92    | 1.01 (0.96, 1.07)                                 | 0.66    | 0.99 (0.90, 1.09)                            | 0.83    |
| Other compounds                     | 1.4                      | 1.01 (0.98, 1.04)                            | 0.46    | 1.01 (0.96, 1.06)                                 | 0.61    | 1.01 (0.93, 1.09)                            | 0.85    |
| Other metals <sup>c</sup>           | 0.5                      | 1.01 (0.97, 1.05)                            | 0.63    | 1.01 (0.95, 1.07)                                 | 0.69    | 1.00 (0.90, 1.10)                            | 0.92    |
| SOA biogenic                        | 0.1                      | 1.03 (0.99, 1.06)                            | 0.10    | 1.04 (0.98, 1.09)                                 | 0.18    | 1.05 (0.96, 1.15)                            | 0.26    |
| SOA anthropogenic                   | 0.1                      | 1.02 (0.98, 1.06)                            | 0.41    | 1.06 (0.99, 1.13)                                 | 0.10    | 1.00 (0.89, 1.12)                            | 0.99    |
| <b>Sources of primary particles</b> |                          |                                              |         |                                                   |         |                                              |         |
| On-road gasoline                    | 0.3                      | 0.99 (0.95, 1.02)                            | 0.46    | 1.01 (0.96, 1.07)                                 | 0.60    | 0.94 (0.86, 1.03)                            | 0.21    |
| Off-road gasoline                   | 0.2                      | 0.99 (0.96, 1.03)                            | 0.65    | 1.03 (0.97, 1.09)                                 | 0.31    | 0.97 (0.88, 1.07)                            | 0.58    |
| On-road diesel                      | 0.4                      | 1.00 (0.97, 1.04)                            | 0.87    | 1.02 (0.96, 1.09)                                 | 0.47    | 0.98 (0.88, 1.08)                            | 0.67    |
| Off-road diesel                     | 0.8                      | 1.00 (0.97, 1.04)                            | 0.98    | 1.04 (0.98, 1.09)                                 | 0.20    | 1.00 (0.92, 1.10)                            | 0.97    |
| Wood smoke                          | 1.3                      | 1.01 (0.98, 1.04)                            | 0.36    | 0.99 (0.95, 1.04)                                 | 0.71    | 1.02 (0.94, 1.10)                            | 0.63    |
| Meat cooking                        | 1.2                      | 0.98 (0.95, 1.02)                            | 0.33    | 1.01 (0.96, 1.07)                                 | 0.73    | 1.00 (0.92, 1.09)                            | 0.97    |
| High sulfur fuel combustion         | 0.4                      | 1.03 (1.01, 1.05)                            | <0.005  | 1.05 (1.02, 1.09)                                 | <0.004  | 1.01 (0.95, 1.07)                            | 0.75    |
| Other anthropogenic                 | 3.8                      | 1.01 (0.97, 1.04)                            | 0.76    | 1.01 (0.95, 1.07)                                 | 0.75    | 0.99 (0.90, 1.09)                            | 0.85    |

<sup>a</sup>HRs stratified for age and race and adjusted for smoking status, smoking pack-years, adult second-hand smoke exposure, BMI, marital status, alcohol consumption, physical activity, menopausal status and HT use combined, family history of heart disease, hypertension medication/aspirin use, dietary fat, fiber and caloric intake. <sup>b</sup>Concentrations x1000. <sup>c</sup>Metals other than Cu, Fe, and Mn.

**Table S4.** Hazard ratios (HR) and 95% confidence interval (CI) for association of UF and mortality outcomes.

| <b>Exposure</b>                     | <b>IQR<br/>(<math>\mu\text{g}/\text{m}^3</math>)</b> | <b>All-cause<br/>mortality<br/>HR<sup>a</sup> (95% CI)</b> | <b>p-value</b> | <b>Cardiovascular<br/>mortality<br/>HR<sup>a</sup> (95% CI)</b> | <b>p-value</b> | <b>Pulmonary<br/>mortality<br/>HR<sup>a</sup> (95% CI)</b> | <b>p-value</b> |
|-------------------------------------|------------------------------------------------------|------------------------------------------------------------|----------------|-----------------------------------------------------------------|----------------|------------------------------------------------------------|----------------|
| <b>Pollutant</b>                    |                                                      |                                                            |                |                                                                 |                |                                                            |                |
| Mass                                | 969                                                  | 1.01 (0.98, 1.05)                                          | 0.38           | 1.03 (0.97, 1.08)                                               | 0.33           | 1.01 (0.93, 1.10)                                          | 0.82           |
| Cu                                  | 0.02                                                 | 1.00 (0.99, 1.02)                                          | 0.89           | 1.03 (1.00, 1.05)                                               | 0.02           | 0.98 (0.93, 1.02)                                          | 0.29           |
| Fe                                  | 0.8                                                  | 1.00 (0.98, 1.02)                                          | 0.98           | 1.01 (0.98, 1.04)                                               | 0.53           | 0.99 (0.93, 1.06)                                          | 0.76           |
| Mn                                  | 0.03                                                 | 1.00 (0.99, 1.00)                                          | 0.31           | 1.00 (0.99, 1.01)                                               | 0.80           | 0.99 (0.96, 1.02)                                          | 0.45           |
| Nitrate                             | -                                                    | -                                                          |                | -                                                               | -              | -                                                          | -              |
| EC                                  | 93                                                   | 1.01 (0.97, 1.04)                                          | 0.72           | 1.04 (0.98, 1.10)                                               | 0.20           | 1.01 (0.92, 1.11)                                          | 0.88           |
| OC                                  | 731                                                  | 1.01 (0.98, 1.04)                                          | 0.43           | 1.02 (0.97, 1.07)                                               | 0.47           | 1.01 (0.93, 1.09)                                          | 0.83           |
| Other compounds                     | 29                                                   | 1.00 (0.98, 1.03)                                          | 0.71           | 1.04 (1.00, 1.08)                                               | 0.05           | 0.98 (0.91, 1.05)                                          | 0.52           |
| Other metals <sup>b</sup>           | 17                                                   | 1.01 (0.98, 1.04)                                          | 0.51           | 1.04 (0.99, 1.09)                                               | 0.14           | 0.98 (0.90, 1.07)                                          | 0.63           |
| SOA biogenic                        | 14                                                   | 1.03 (1.00, 1.07)                                          | 0.08           | 1.04 (0.99, 1.10)                                               | 0.12           | 1.06 (0.97, 1.15)                                          | 0.21           |
| SOA anthropogenic                   | 24                                                   | 1.02 (0.98, 1.07)                                          | 0.29           | 1.07 (0.99, 1.14)                                               | 0.07           | 1.01 (0.90, 1.13)                                          | 0.84           |
| <b>Sources of primary particles</b> |                                                      |                                                            |                |                                                                 |                |                                                            |                |
| On-road gasoline                    | 108                                                  | 0.99 (0.95, 1.02)                                          | 0.49           | 1.02 (0.96, 1.07)                                               | 0.59           | 0.94 (0.86, 1.03)                                          | 0.21           |
| Off-road gasoline                   | 33                                                   | 0.99 (0.96, 1.03)                                          | 0.69           | 1.03 (0.97, 1.09)                                               | 0.31           | 0.98 (0.88, 1.08)                                          | 0.63           |
| On-road diesel                      | 56                                                   | 1.01 (0.97, 1.05)                                          | 0.75           | 1.02 (0.96, 1.09)                                               | 0.44           | 0.98 (0.89, 1.08)                                          | 0.70           |
| Off-road diesel                     | 73                                                   | 1.00 (0.97, 1.04)                                          | 0.91           | 1.04 (0.98, 1.09)                                               | 0.21           | 1.01 (0.92, 1.10)                                          | 0.89           |
| Wood smoke                          | 332                                                  | 1.01 (0.99, 1.05)                                          | 0.33           | 0.98 (0.94, 1.03)                                               | 0.53           | 1.02 (0.95, 1.10)                                          | 0.59           |
| Meat cooking                        | 128                                                  | 0.99 (0.95, 1.02)                                          | 0.42           | 1.02 (0.97, 1.08)                                               | 0.47           | 0.99 (0.91, 1.08)                                          | 0.87           |
| High sulfur fuel combustion         | 54                                                   | 1.01 (0.99, 1.03)                                          | 0.25           | 1.04 (1.01, 1.07)                                               | <0.005         | 0.99 (0.94, 1.04)                                          | 0.73           |
| Other anthropogenic                 | 400                                                  | 1.01 (0.99, 1.03)                                          | 0.39           | 1.02 (0.99, 1.05)                                               | 0.30           | 1.01 (0.96, 1.06)                                          | 0.75           |

<sup>a</sup>HRs stratified for age and race and adjusted for smoking status, smoking pack-years, adult second-hand smoke exposure, BMI, marital status, alcohol consumption, physical activity, menopausal status and HT use combined, family history of heart disease, hypertension medication/aspirin use, dietary fat, fiber and caloric intake. <sup>b</sup>Metals other than Cu, Fe, and Mn.
